# Supplementary material for: Convoluted Plasma Membrane Domains in the Green Alga Chara are Depleted of Microtubules and Actin Filaments
Source: PubMed Central journal article supplement — Plant Cell Physiol. Author manuscript; Available in PMC 2015 Dec 18. (PMC4684100; doi:10.1093/pcp/pcv119), 2015-08-12
Supplement: NIHMS66379-supplement-4.pdf [file NIHMS66379-supplement-4.pdf]

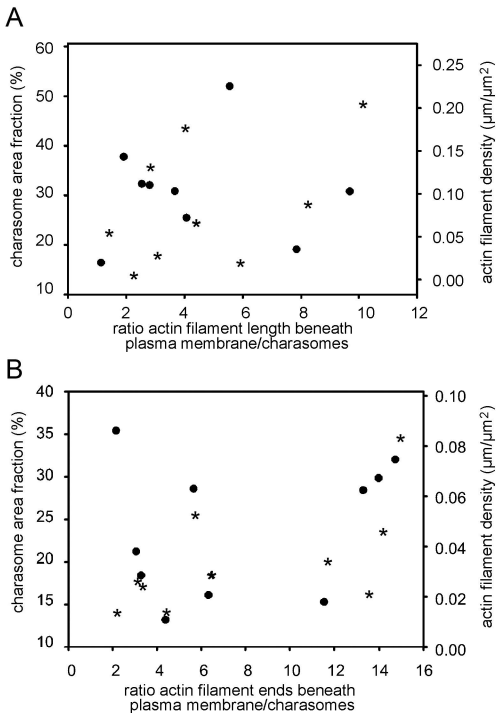

**Supplementary Fig. 4** Actin filament ratios in individual cells. A Ratio of relative actin filament length per  $\mu\text{m}^2$  smooth plasma membrane versus relative actin length per  $\mu\text{m}^2$  charasome surface is independent of charasome area fraction (dots) and actin filament density (asterisks). B Ratio of relative number of actin ends per  $\mu\text{m}^2$  smooth plasma membrane versus relative number of actin filament ends per  $\mu\text{m}^2$  charasome surface is also independent of charasome area fraction (dots) and actin filament density (asterisks).
